# Supplementary material for: A synchronous approach for facile production of Ge–carbon hybrid nanoparticles for high-performance lithium batteries
Source: Royal Society of Chemistry journal article supplement (doi:10.1039/c5cc00080g), 2015-01-01
Supplement: c5cc00080g1.pdf [file c5cc00080g1.pdf]

## Supporting Information

### A synchronous approach for facile production of Ge/carbon hybrid nanoparticles for high-performance lithium batteries

Xiaona Li, Jianwen Liang, Zhiguo Hou, Yongchun Zhu\* Yan Wang, and Yitai Qian

#### *Experimental Section*

All chemicals were of analytical grade and purchased from Shanghai Chemical Industrial Corp. and used as received without further purification. A typical synthesis process was as follows.

**Preparation of benzfluorenone-germanium chelate complex (BGe):** In a typical synthesis, 0.29 g of GeO<sub>2</sub> was first dissolved in 50 mL HCl (33 - 37%) at room temperature under magnetic stirring. Then 125 mL of 0.5 M benzfluorenone-dissolved acidified alcohol solution was added dropwise to the above solution to form a complex, and then adjusted to pH =2.5, by using NH<sub>4</sub>OH. The resulting mixture was stirred at room temperature for 12 h, then the complex precursor was collected by filtration, washed with distilled water and ethanol.

**Preparation of final Ge/carbon hybrid nanoparticles:** The BGe precursor was firstly heated to 800 °C at the heating rate of 5 min<sup>-1</sup> under Ar/H<sub>2</sub> (95:5 v/v%) atmosphere and then kept at that temperature for 5 h to obtain carbonized BGe (CBGe) sample. For the further activation process, the CBGe was heated in air at different temperature and time, and the corresponding samples were named as CBGe-T-t (T for temperature and t for time during activation). The carbon content of CBGe-460-6 sample is about 8.9 wt% based on elemental analysis (CBGe-450-8 and CBGe-470-4 sample is about 19.8 wt% and 30 wt%, respectively).

**Preparation of tannic-induced Ge/carbon hybrid nanoparticles:** The synthesis procedure is same as the CBGe-T-t samples, except that benzfluorenone-dissolved acidified alcohol solution is changed to tannic solution with different solvent (water and ethanol).

**Material Characterization:** XRD patterns were collected using a Philips X' Pert Super diffract meter with Cu K $\alpha$  radiation ( $\lambda=1.54178$  Å). The morphology of the products was characterized by a field-emission scanning electron microscope (SEM, JEOL-JSM-6700F). TEM and HRTEM images were recorded by Hitachi H7650 and HRTEM, JEOL 2010 microscope. TG analysis was performed with a TGA-2050 (TA Corp.) apparatus at a heating rate of 10 °C min<sup>-1</sup> in flowing air and N<sub>2</sub>. Raman spectra were collected on an EA (Vario EL-III) using a 514.5 nm laser. Nitrogen adsorption/desorption measurements were carried out on a VELSORP-mini II (BEL Japan, Inc.) at 473 K in the relative pressure range of P/P<sub>0</sub> from 0 to 1 to determine the Brunauer–Emmett–Teller (BET) surface areas and pore size distribution. Fourier transfer infrared (FTIR) spectra were measured using an IFS-85 (Bruker) spectrometer.

**Electrochemical Measurement:** The lithium-storage properties were investigated by assembling 2016 coin cells under an argon-filled glove box (H<sub>2</sub>O, O<sub>2</sub> < 1 ppm). The aqueous slurry containing 70% active material, 15% Super P carbon black, and 15% sodium carboxymethylcellulose (CMC) binder was spread on a piece of copper foil. After drying in vacuum at 80 °C for 12 h, it was cut into small pieces with a diameter of 12 mm. The cells were assembled in a glovebox filled with Ar atmosphere, using metallic lithium metal as counter electrode, Celgard 2300 membrane as the separator, and 1 M LiPF<sub>6</sub> dissolved in ethylene carbonate (EC)–dimethyl carbonate (DMC)–diethyl carbonate (DEC) mixture (1 : 1 : 1, by Volume; Merck) as the electrolyte. The cycling and rate performances were recorded on a Land battery measurement system (Wuhan, China) with a cut-off voltage of 0.005 – 1.50 V vs. Li<sup>+</sup>/Li (1 C = 1600 mA h g<sup>-1</sup>). The tests were firstly conducted in parallel to the pure Ge nanoparticles in order to disclose the important role of buffering carbon layer.

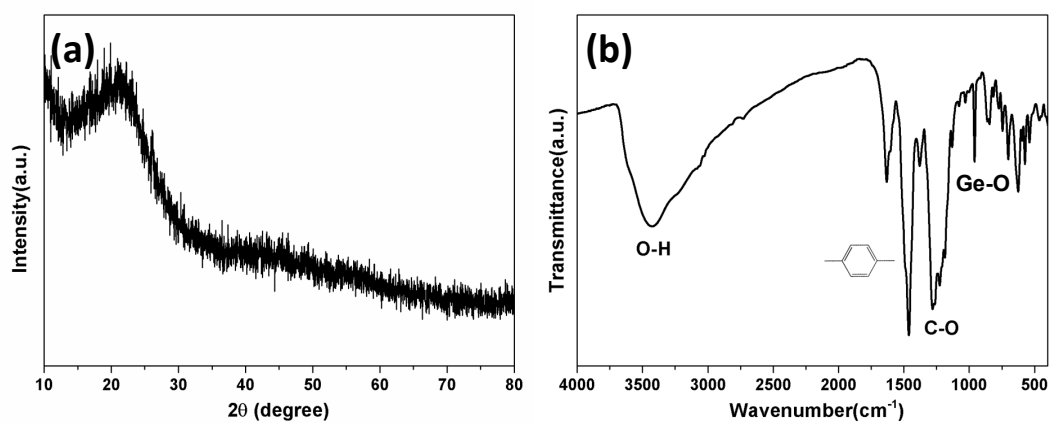

**Figure S1.** (a) XRD pattern and (b) FTIR spectra of benzfluorenone-germanium chelate complex (BGe) precursor.

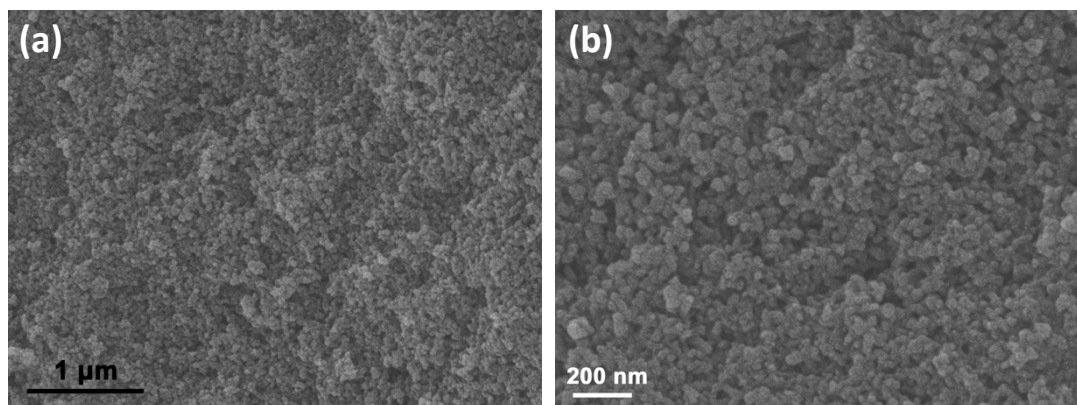

**Figure S2.** (a,b) SEM images of BGe precursor.

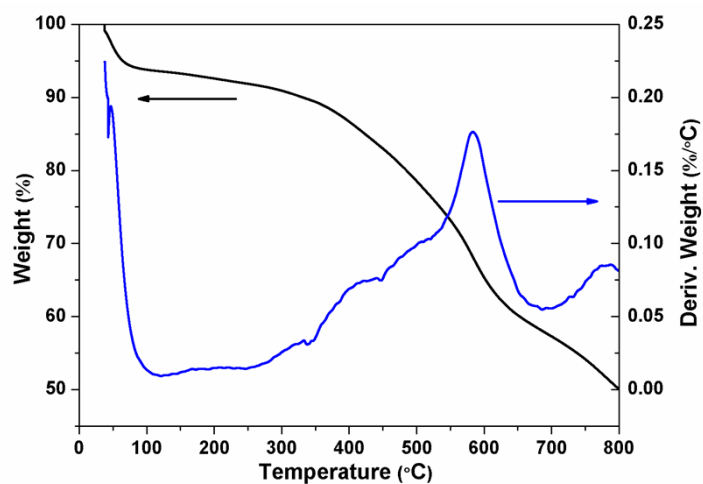

**Figure S3.** TGA curve of the as-synthesized BGe precursor in  $\text{N}_2$  atmosphere.

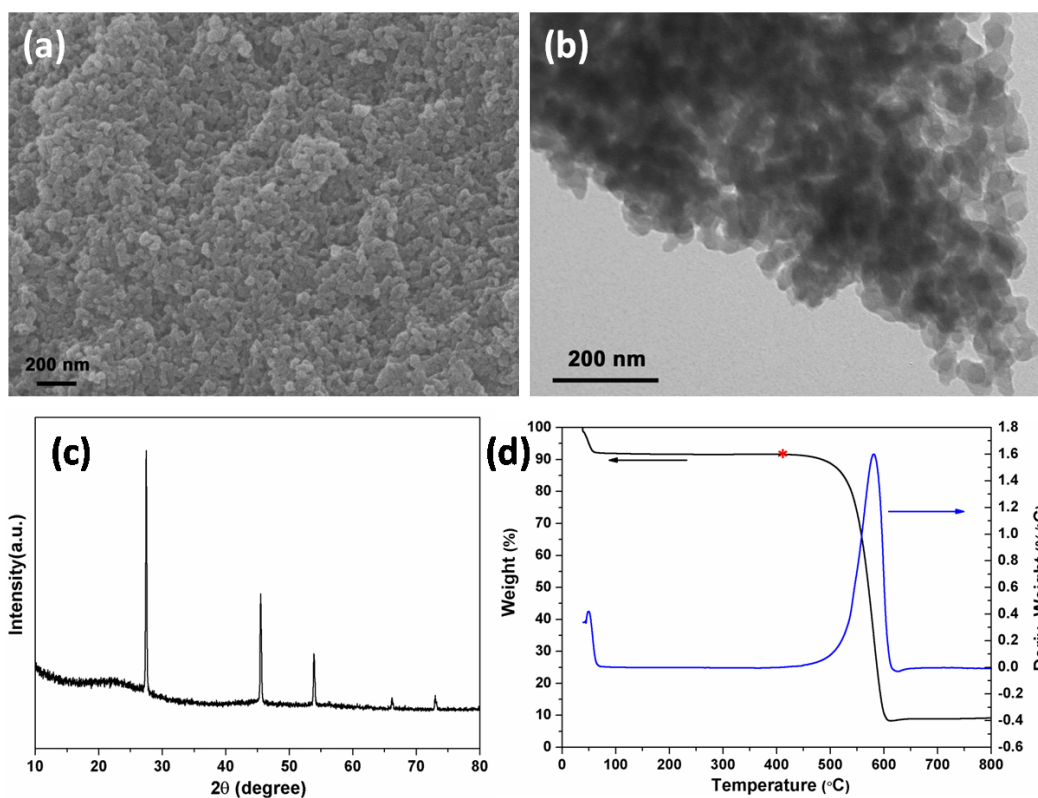

**Figure S4.** (a) SEM image, (b) TEM image, (c) XRD pattern and (d) TGA curve in air atmosphere of carbonized BGe precursor after Ar/H<sub>2</sub> (CBGe).

From the TGA curve (Figure S4d), one can see that the weight loss due to the loss of carbon in the composite is starting slowly from 408 °C (\*), and the main reaction temperature is much higher than 500 °C. Since the carbon content of CBGe precursor is as high as about ~ 70%, the carbon content can still retain high ratio in the CBGe-470-4 sample.

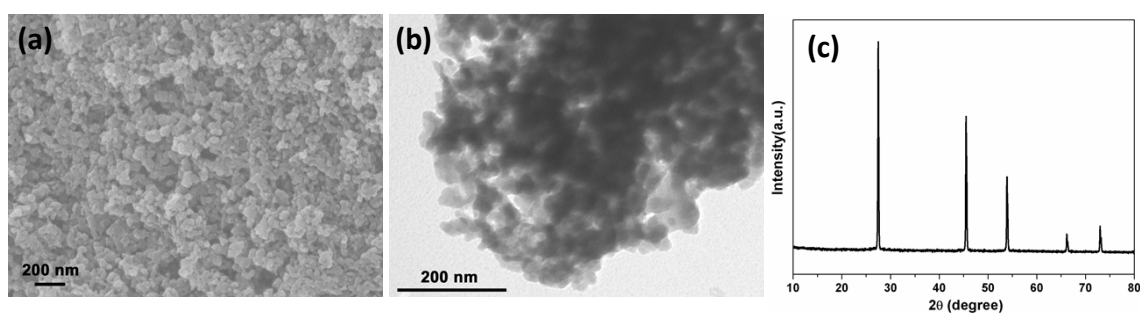

**Figure S5.** (a) SEM image, (b) TEM image and (c) XRD pattern of as-prepared CBGe-450-8 sample.

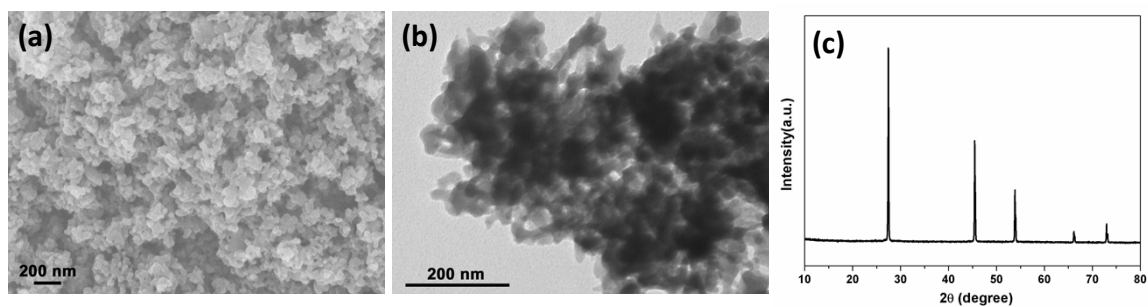

**Figure S6.** (a) SEM image, (b) TEM image and (c) XRD pattern of as-prepared CBGe-470-4 sample.

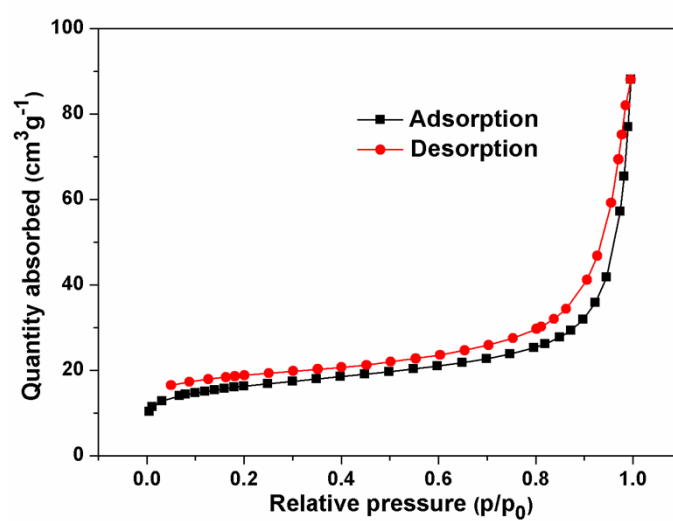

**Figure S7.** Nitrogen adsorption and desorption isotherms of CBGe-460-6.

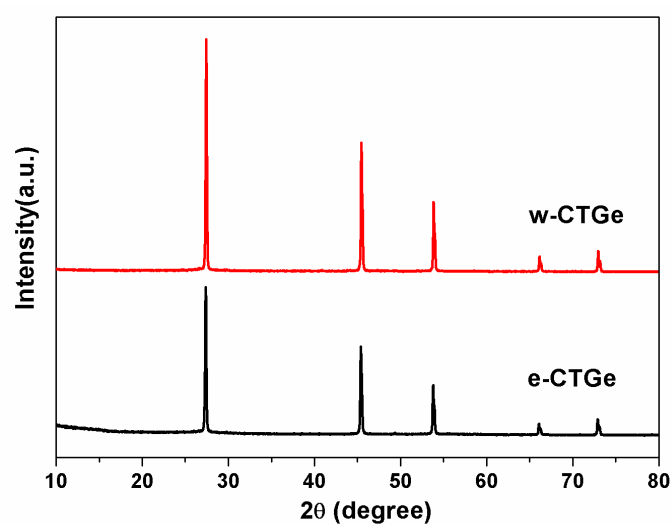

**Figure S8.** XRD patterns of w-CTGe and e-CTGe samples.

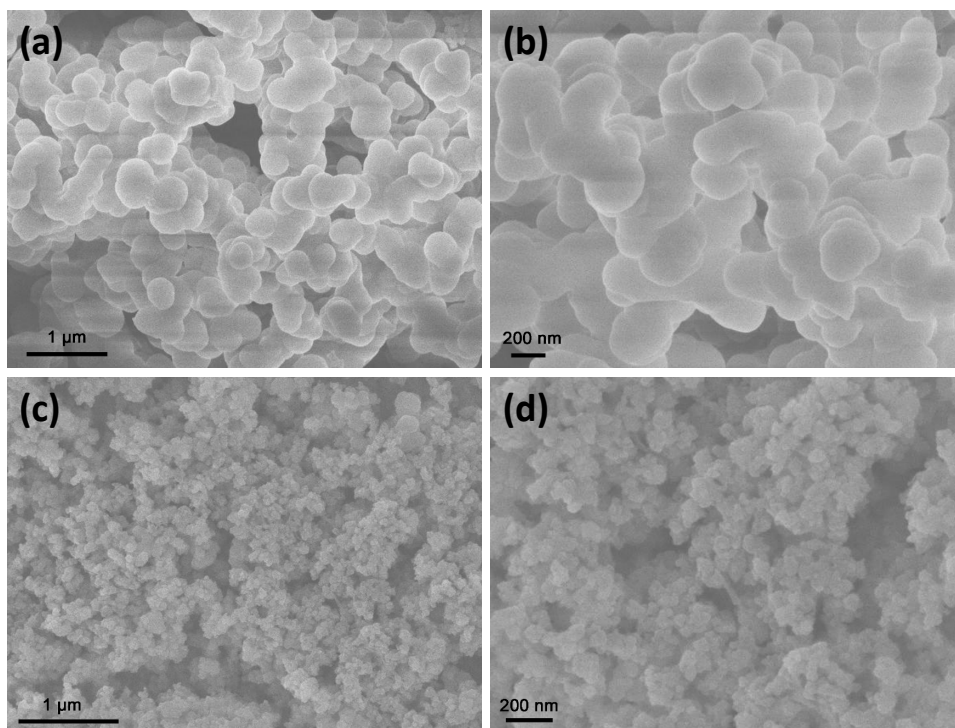

**Figure S9.** SEM images of as-prepared (a,b) TGe precursor with tannin dissolved in water and (c,d) TGe precursor with tannin dissolved in ethanol.

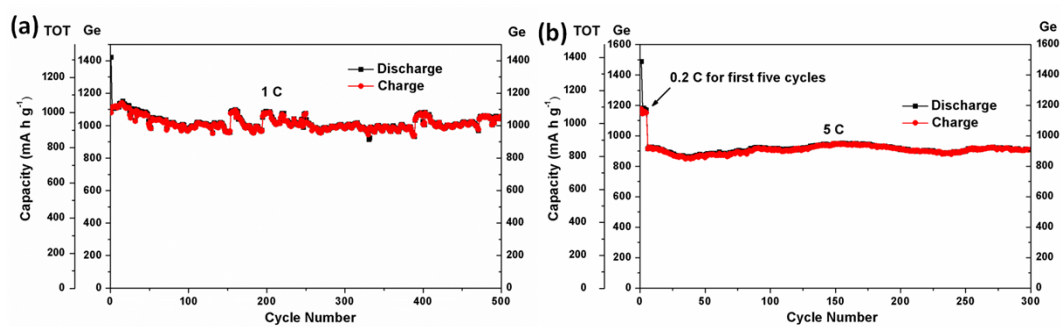

**Figure S10.** Cycling performance of CBGe-460-6 electrode at 1 C and 5 C. Specific capacity values are referred to the active material amount of both the pure germanium (i.e., Ge) and the total weight including Ge and carbon (i.e., TOT = Ge + carbon)

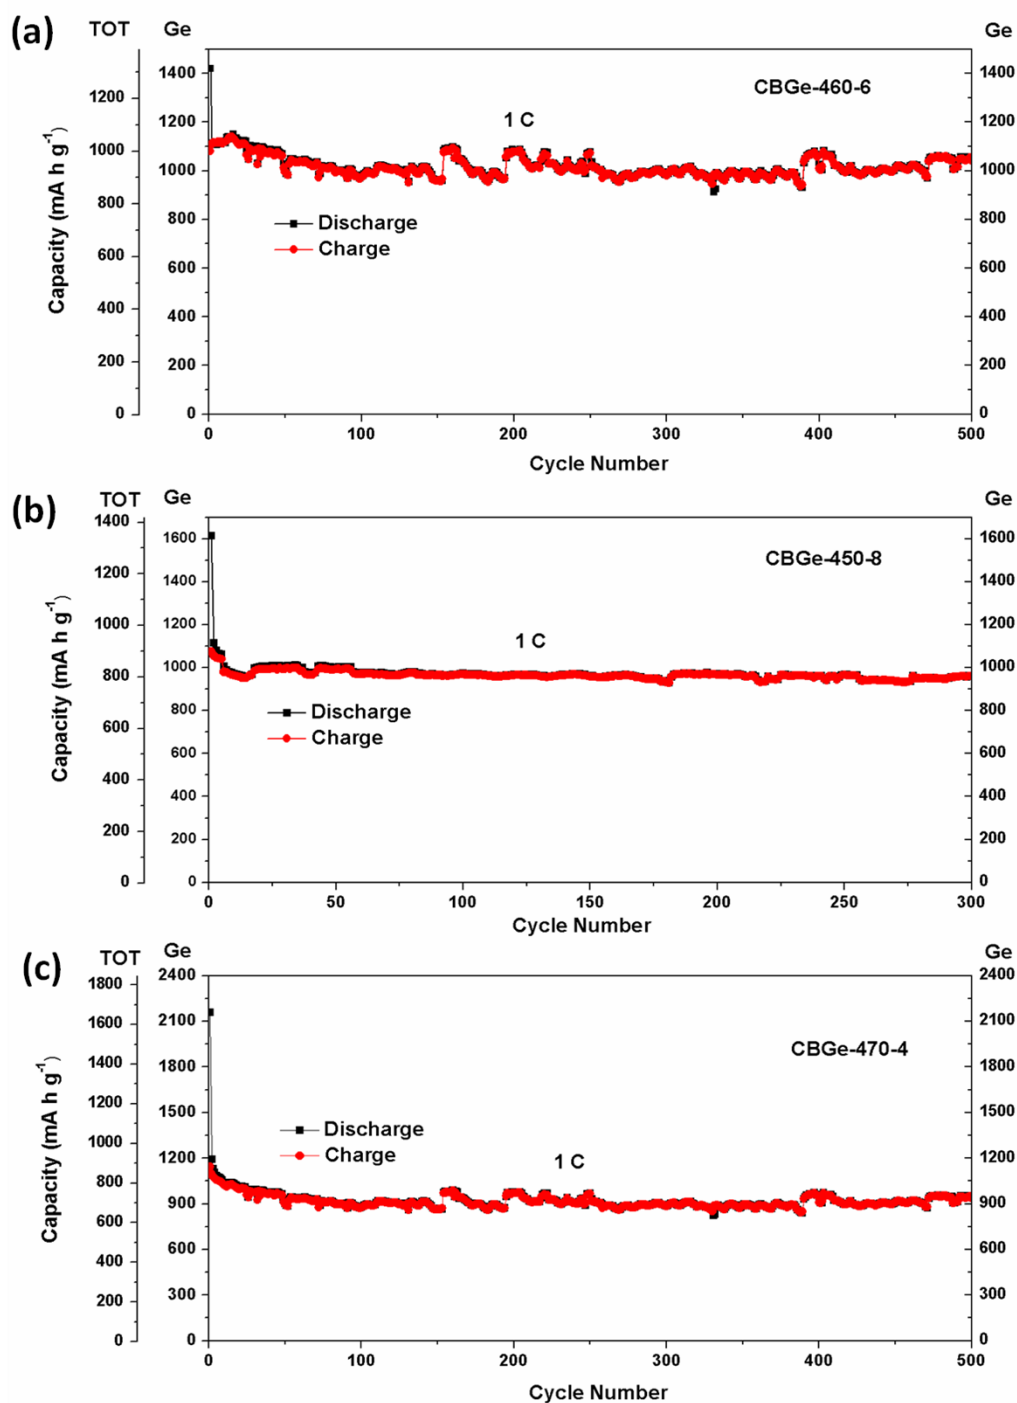

**Figure S11.** Cycling performance of (a) CBGe-460-6, (b) CBGe-450-8, and (c) CBGe-470-4 electrodes at 1 C. Specific capacity values are referred to the active material amount of both the pure germanium (i.e., Ge) and the total weight including Ge and carbon (i.e., TOT = Ge + carbon)

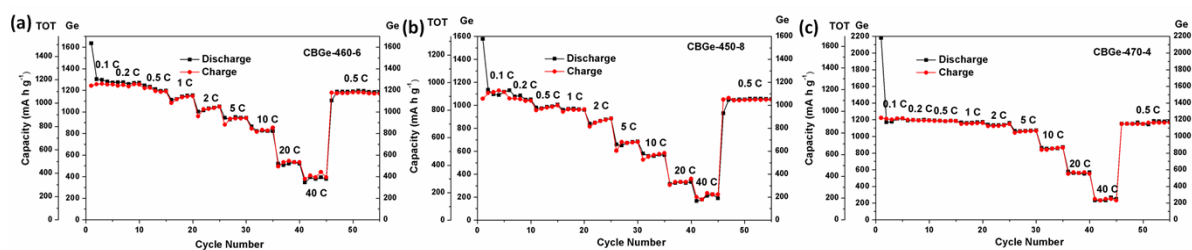

**Figure S12.** Rate capabilities of (a) CBGe-460-6, (b) CBGe-450-8, and (c) CBGe-470-4 electrodes from 0.1 C to 40 C. Specific capacity values are referred to the active material amount of both the pure germanium (i.e., Ge) and the total weight including Ge and carbon (i.e., TOT = Ge + carbon)

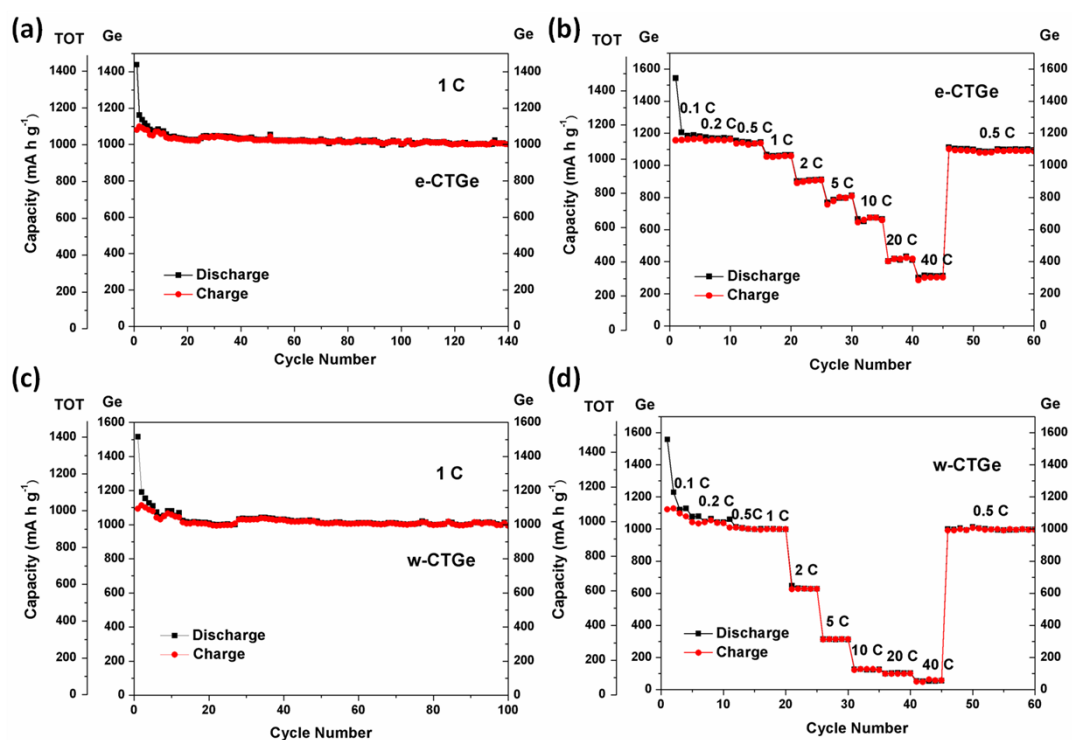

**Figure S13.** Cycling performance and rate capabilities of (a,b) e-CTGe and (c,d) w-CTGe electrodes, respectively. Specific capacity values are referred to the active material amount of both the pure germanium (i.e., Ge) and the total weight including Ge and carbon (i.e., TOT = Ge + carbon)

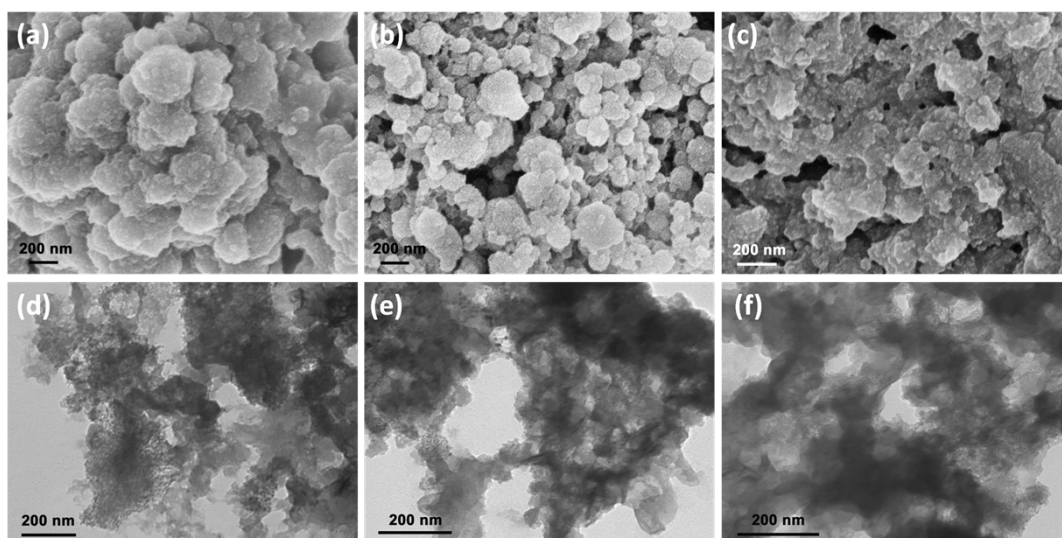

**Figure S14.** (a–c) SEM (d–f) TEM images of CBGe-460-6 sample after 200, 500, and 1000 cycles, respectively.
